# Supplementary figures and images for: The interaction between P2X3 and TRPV1 in the dorsal root ganglia of adult rats with different pathological pains
Source: PubMed Central journal article supplement — Mol Pain. 2021 Apr 27;17:17448069211011315. doi: 10.1177/17448069211011315 (PMC8108079; doi:10.1177/17448069211011315), 2021-04-27

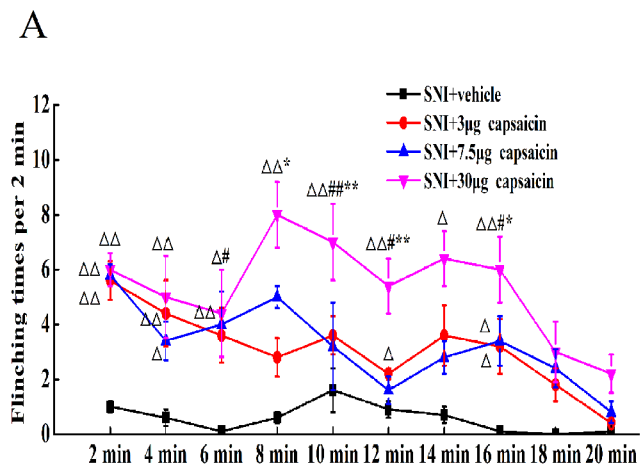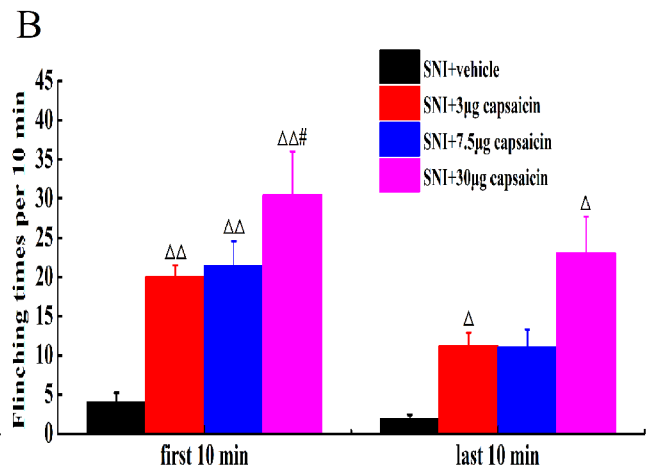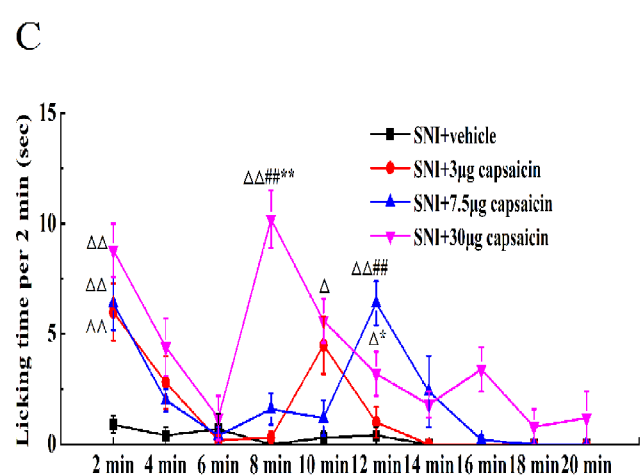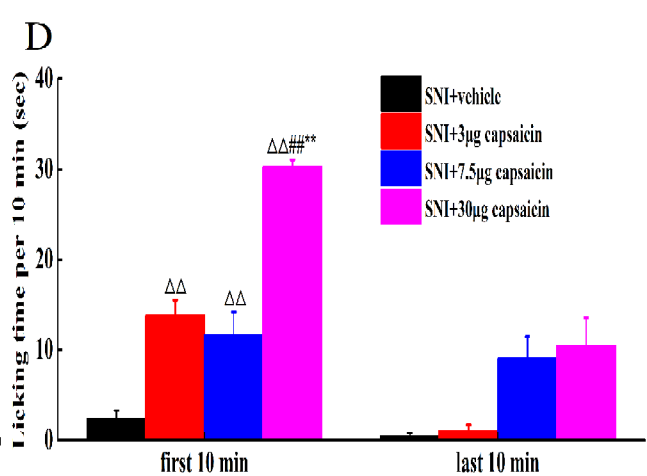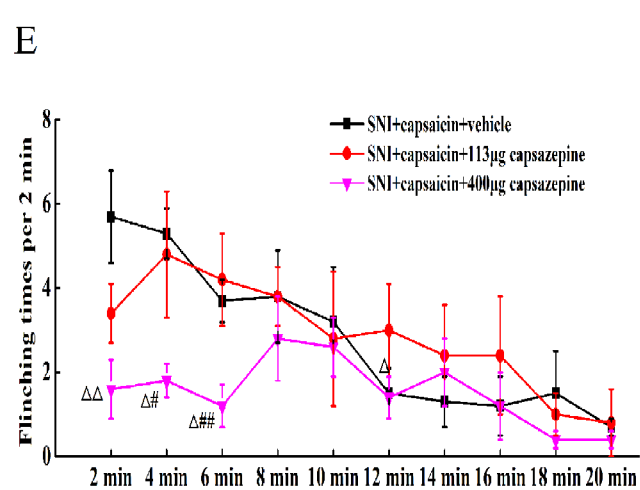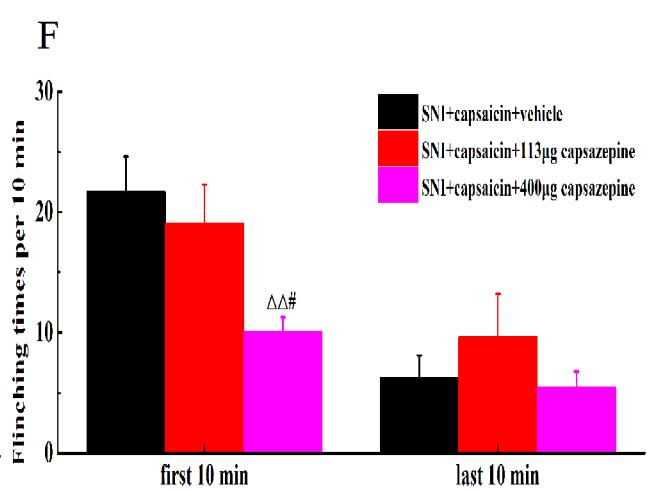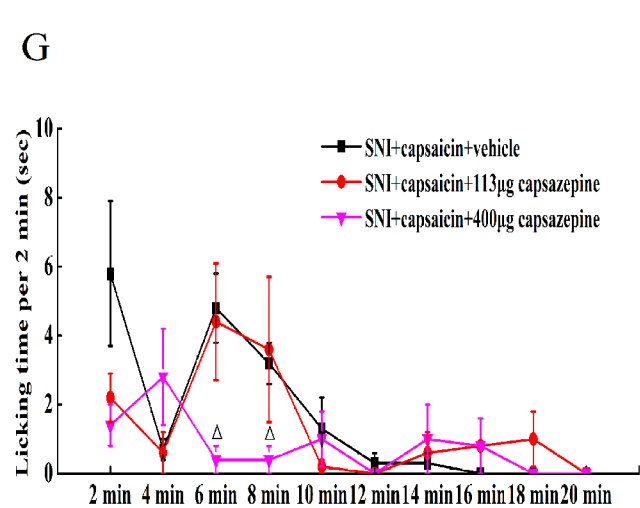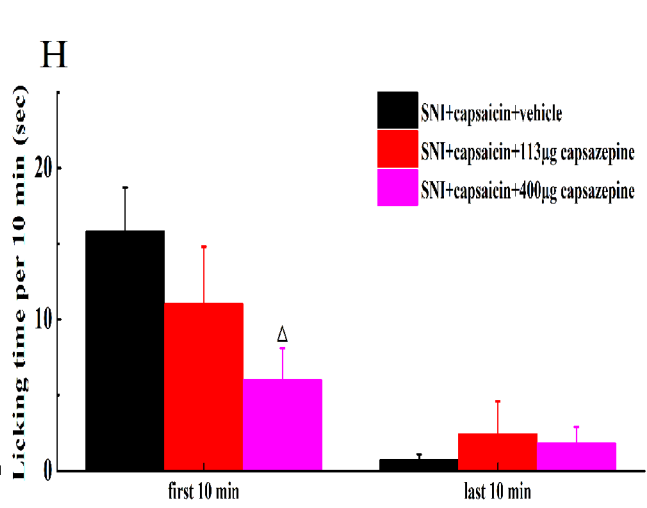

Supplement: sj-pdf-1-mpx-10.1177_17448069211011315.pdf [file sj-pdf-1-mpx-10.1177_17448069211011315.pdf]

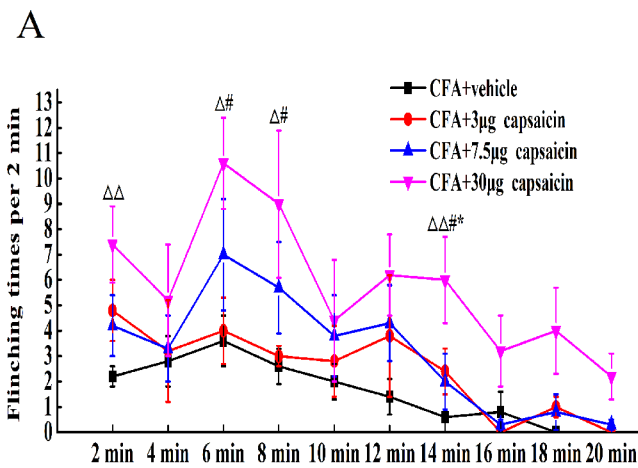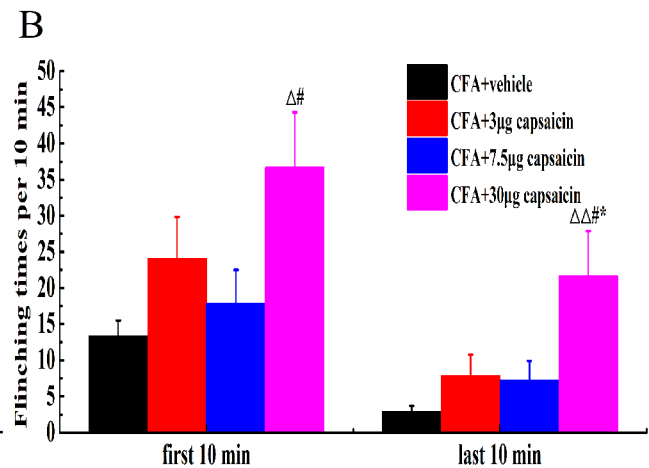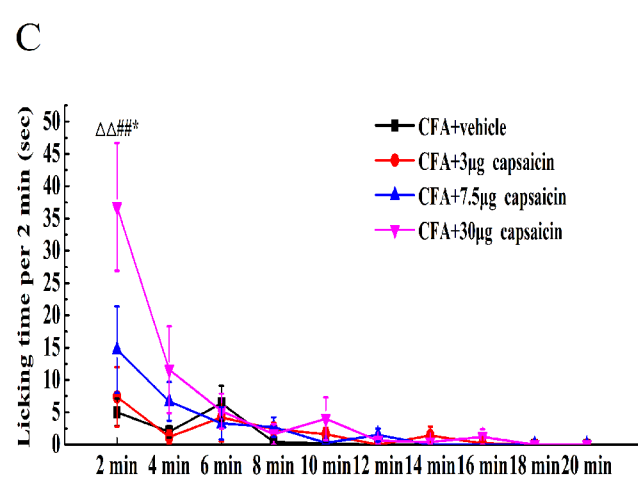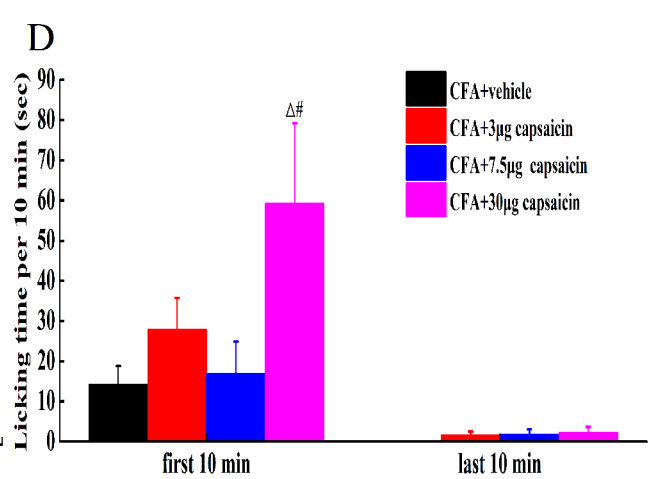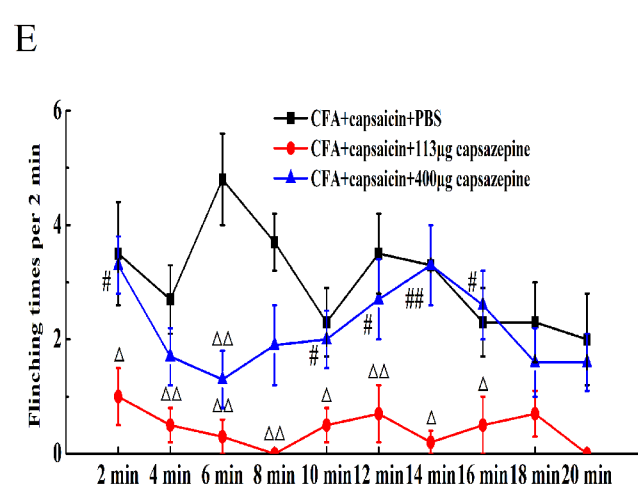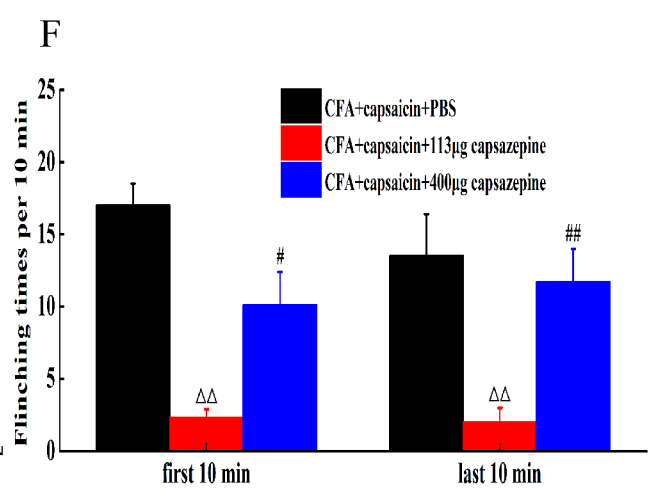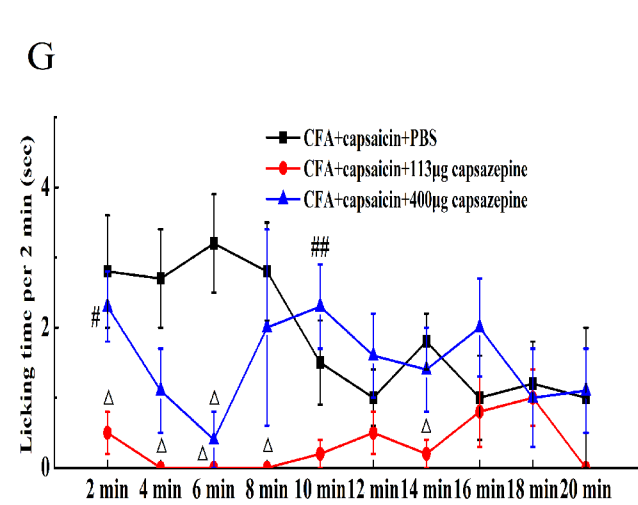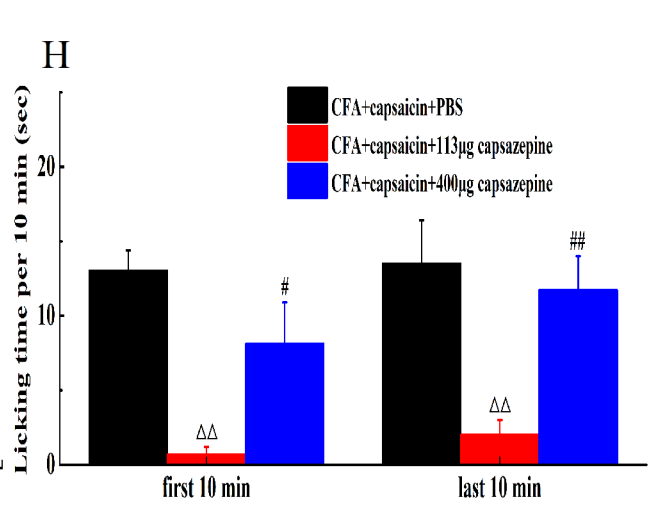

Supplement: sj-pdf-2-mpx-10.1177_17448069211011315.pdf [file sj-pdf-2-mpx-10.1177_17448069211011315.pdf]

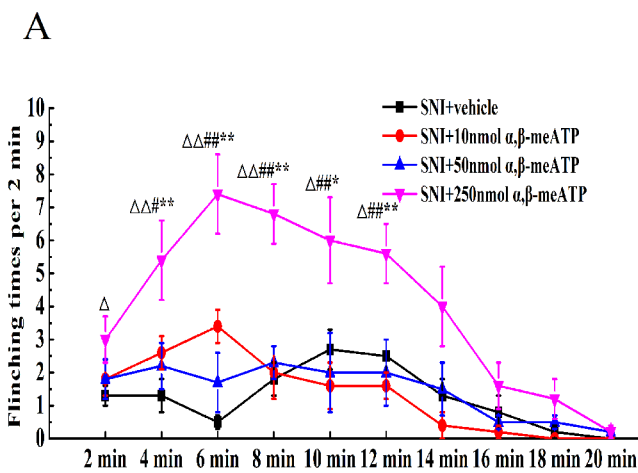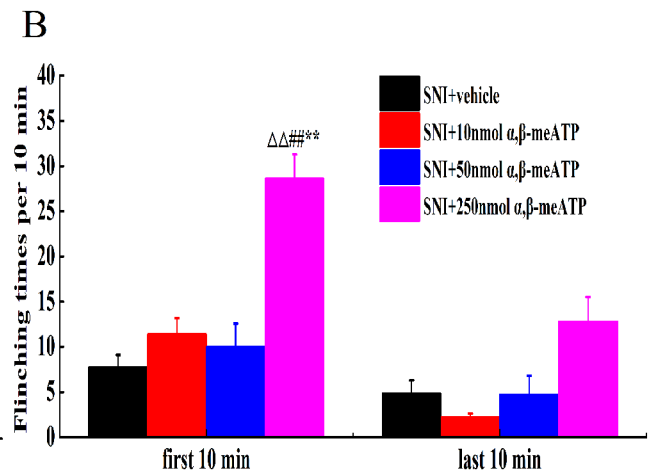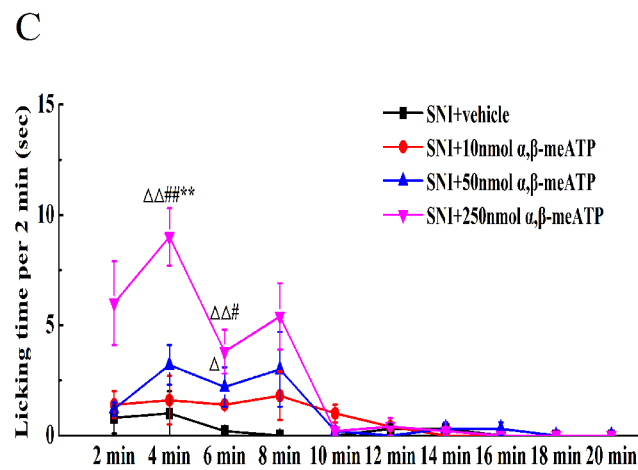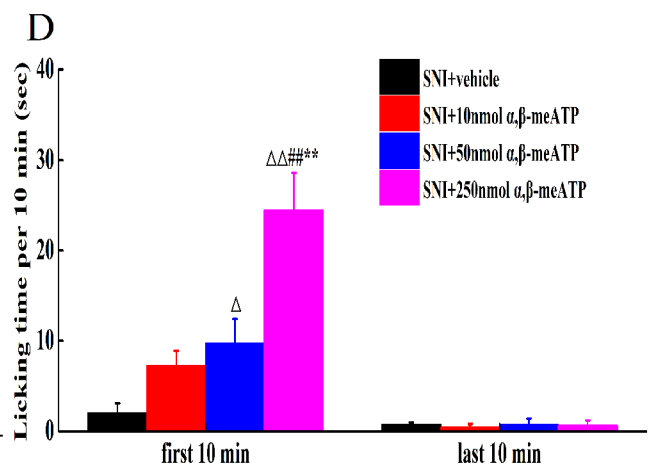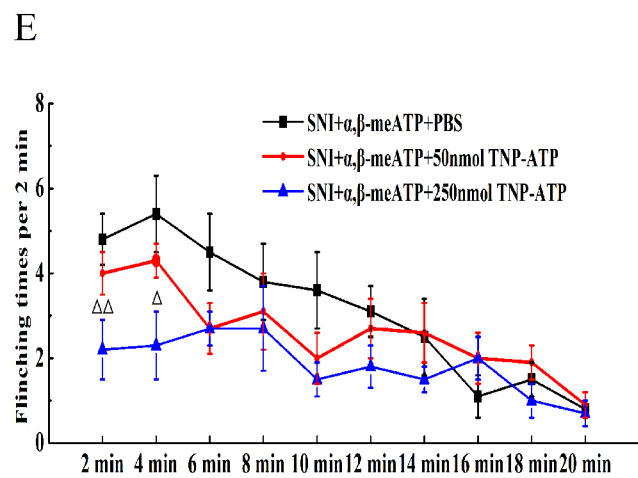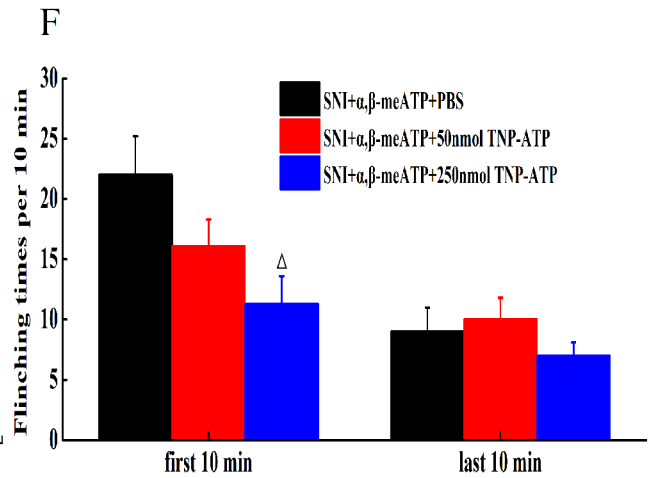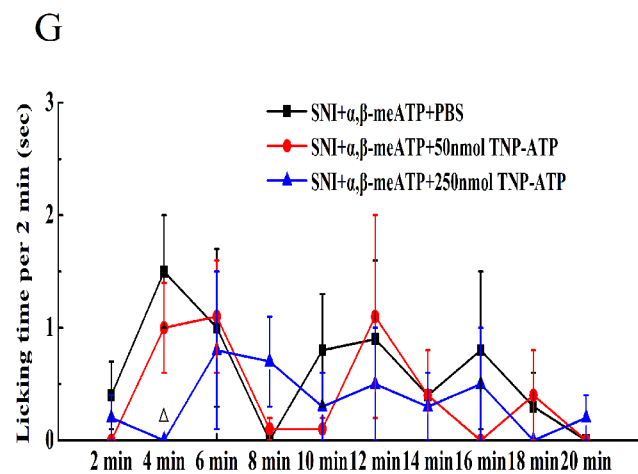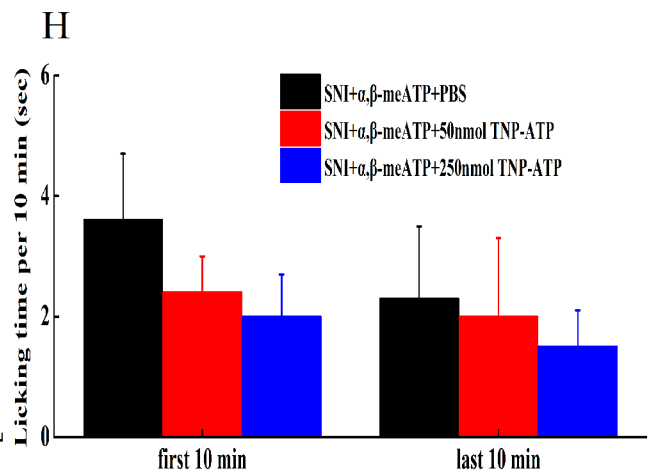

Supplement: sj-pdf-3-mpx-10.1177_17448069211011315.pdf [file sj-pdf-3-mpx-10.1177_17448069211011315.pdf]

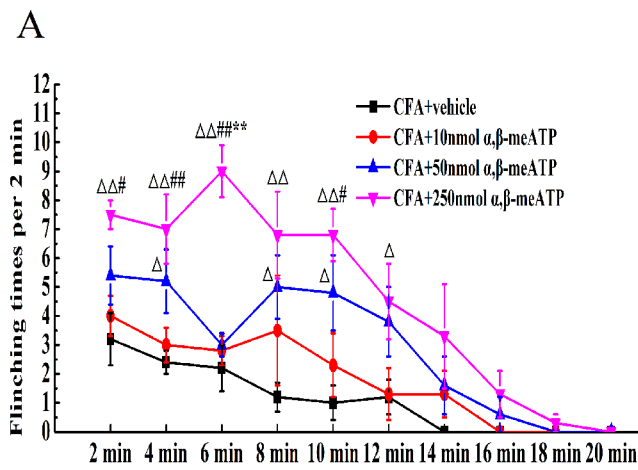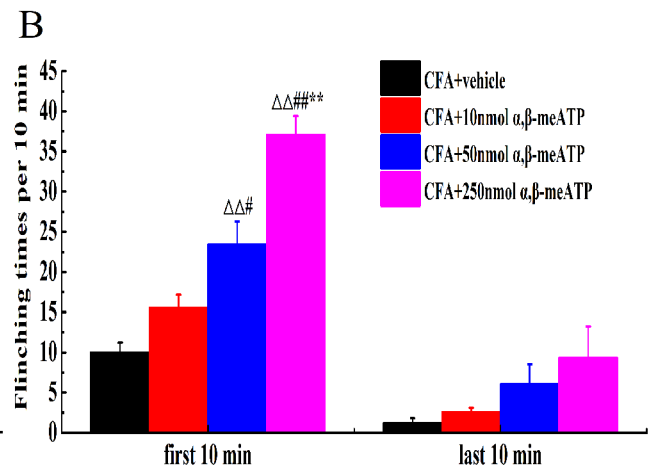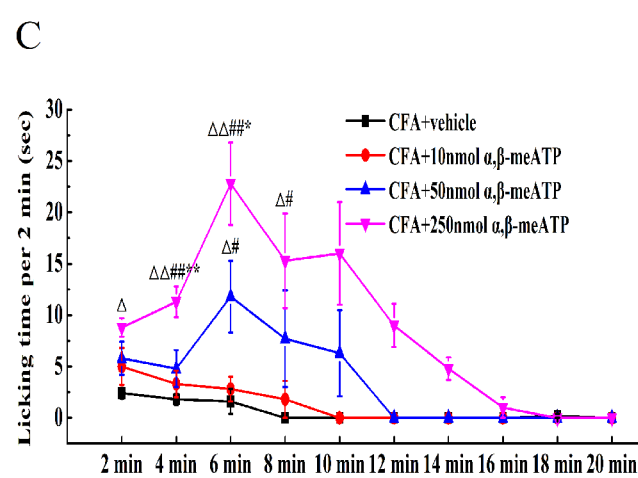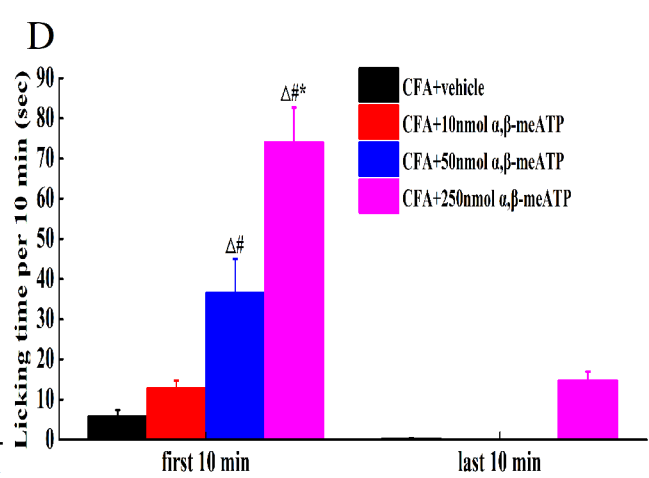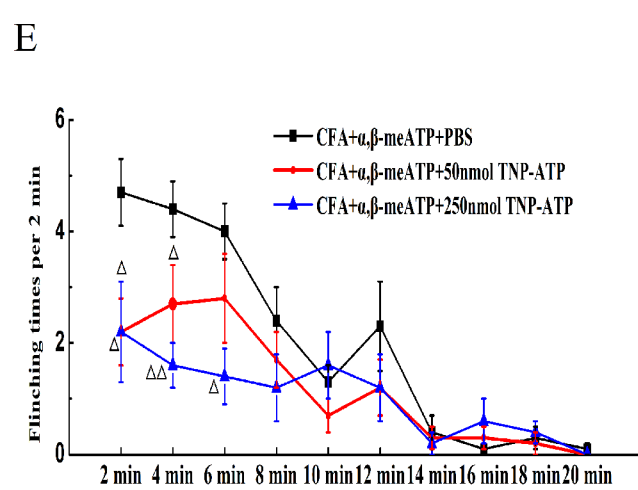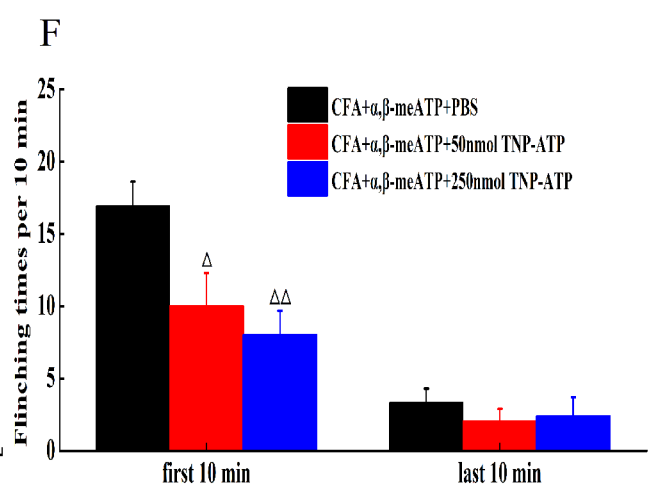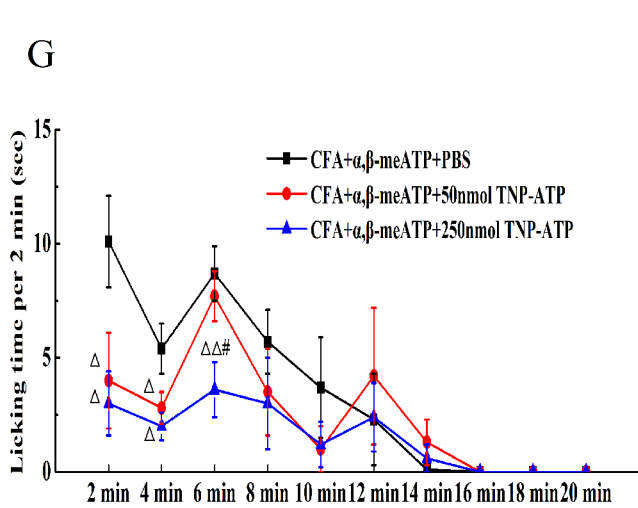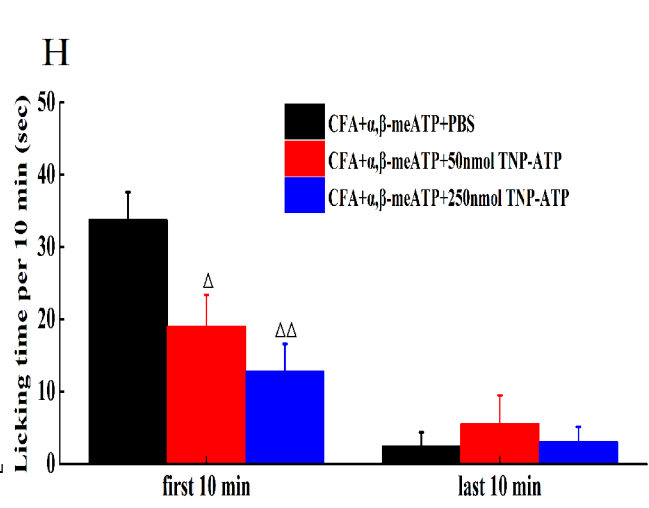

Supplement: sj-pdf-4-mpx-10.1177_17448069211011315.pdf [file sj-pdf-4-mpx-10.1177_17448069211011315.pdf]
